1 **Extreme mito-nuclear discordance within Anthozoa, with notes on unique properties of**  
2 **their mitochondrial genomes**

3

4

5 Andrea M. Quattrini<sup>1</sup>, Karen Snyder<sup>2</sup>, Risa Purow-Ruderman<sup>2</sup>, Isabela G.L. Seiblit<sup>3,4</sup>, Johnson  
6 Hoang<sup>2</sup>, Natasha Floerke<sup>2</sup>, Nina I. Ramos<sup>1</sup>, Herman H. Wirshing<sup>1</sup>, Estefanía Rodríguez<sup>5</sup>, and  
7 Catherine S. McFadden<sup>2</sup>

8

9 <sup>1</sup> Department of Invertebrate Zoology, National Museum of Natural History, Smithsonian  
10 Institution, 10th St. & Constitution Ave. NW, Washington, D.C. 20560, United States

11 <sup>2</sup> Department of Biology, Harvey Mudd College, Claremont CA 91711

12 <sup>3</sup> Centre for Marine Biology, University of São Paulo, 11612-109 São Sebastião, Brazil

13 <sup>4</sup> Department of Zoology, Institute of Biosciences, University of São Paulo, 05508-900 São Paulo,  
14 Brazil

15

16 <sup>5</sup> Division of Invertebrate Zoology, American Museum of Natural History, Central Park West at  
17 79<sup>th</sup> Street, New York NY 10024, USA

18

19

20 Corresponding Author:  
21 Andrea Quattrini  
22 Washington, DC, 20560, USA  
23 Email address: quattrinia@si.edu

24

25

26

27

28

29

30

31

32 **Abstract**

33           Whole mitochondrial genomes are often used in phylogenetic reconstruction. However,  
34 discordant patterns in species relationships between mitochondrial and nuclear phylogenies are  
35 commonly observed. Within Anthozoa (Phylum Cnidaria), mitochondrial-nuclear discordance  
36 has not yet been examined using a large and comparable dataset. Here, we used data obtained  
37 from target-capture enrichment sequencing to assemble and annotate mitochondrial genomes and  
38 reconstruct phylogenies for comparisons to phylogenies inferred from 100s of nuclear loci  
39 obtained from the same samples. The datasets comprised 108 hexacorals and 94 octocorals  
40 representing all orders and >50% of extant families. Results indicated rampant discordance  
41 between datasets at every taxonomic level. This discordance is not attributable to substitution  
42 saturation, but rather likely caused by recent and ancient introgressive hybridization and  
43 selection. We also found strong purifying selection across the mitochondrial genomes,  
44 cautioning their use in analyses that rely on assumptions of neutrality. Furthermore, unique  
45 properties of the mitochondrial genomes were noted, including genome rearrangements and the  
46 presence of *nad5* introns. Specifically, we note the presence of the homing endonuclease in  
47 ceriantharians. This large dataset of mitochondrial genomes further demonstrates the utility of  
48 off-target reads generated from target-capture data for mitochondrial genome assembly and adds  
49 to the growing knowledge of anthozoan evolution.

50

51

52

53

54

## 55 **Introduction**

56 Mitochondrial (mt) genes have a long history of use for phylogenetic reconstruction in  
57 animals [1], and the relative ease with which complete mt genomes can now be obtained has  
58 fueled an increase in their use to resolve phylogenetic relationships within many groups [2-4].  
59 Animal mt genomes typically include a highly conserved set of protein-coding genes with few  
60 non-coding intergenic regions; are inherited uniparentally without undergoing recombination;  
61 and in many cases have rates of substitution that may be an order of magnitude higher than those  
62 of the nuclear genome [5]. While these properties are advantageous for phylogenetic  
63 reconstruction, they may also generate phylogenetic signals that differ from those of the nuclear  
64 genome. Discordance between nuclear and mt gene phylogenies is common and can result from  
65 biological processes such as introgression or incomplete lineage sorting (ILS) that act differently  
66 on mt vs. nuclear genomes [e.g., 6-8]. Alternatively, apparent mito-nuclear discordance can arise  
67 from inaccurate estimation of phylogenies due to low statistical power, poor model fit or taxon  
68 sampling issues [8]. Recent advances in computational models and increased taxon sampling of  
69 both mt and nuclear genomes have allowed these alternative sources of discordance to be  
70 evaluated in several well-sampled vertebrate taxa [6,8]. Studies have concluded that mito-nuclear  
71 discordance more often arises from biological processes such as introgression and ILS and  
72 persists even when factors that lead to inaccurate phylogenetic estimation have been addressed  
73 [6-8].

74 Phylogenies of anthozoan cnidarians (e.g., corals and sea anemones) reconstructed from  
75 mt genes or genomes have often recovered relationships within and among orders that differ  
76 from those inferred from both nuclear genes and morphology. The mt genomes of these non-  
77 bilaterian metazoans have several unusual properties that are not found in bilaterians [9] that may

78 contribute to mito-nuclear discordance in this group. For example, the mt genomes of class  
79 Hexacorallia (e.g., sea anemones, scleractinian corals and black corals) encode the standard 13  
80 protein-coding genes found in bilaterians, but only two tRNAs (trnW, trnM) [10-14]. Many  
81 hexacorals have group I introns in *nad5* or *cox1* [10-13], and the latter gene may have a LAGLI-  
82 DADG type homing endonuclease encoded within it [13]. The ceriantharian tube anemones have  
83 multipartite linear mt genomes [15]. All members of class Octocorallia (e.g., soft corals,  
84 gorgonians and sea pens) have just a single tRNA (trnM), but with only one known exception  
85 (i.e., a member of genus *Pseudoanthomastus*; [16]) their mt genomes include an additional  
86 protein-coding gene that encodes the DNA mismatch repair protein, *mtMutS* [17]. At least one  
87 sea pen has a bipartite circular mt genome [18], and other octocoral lineages have undergone  
88 frequent rearrangements (inversions) of gene order by a mechanism that appears to involve  
89 intramolecular recombination [19-21].

90       The unusual property of anthozoan mt genomes that has most impacted their utility for  
91 phylogenetic reconstruction is, however, the rate at which they evolve. Unlike bilaterian mt  
92 genomes that tend to evolve 5-10X faster than the nuclear genome [22-23], anthozoan mt genes  
93 typically evolve 10-100X slower than nuclear genes [24]. As a result, mt genes that have been  
94 widely used in bilaterians for barcoding, species-level phylogenetic analyses and  
95 phylogeography are often invariant within—and sometimes between—anthozoan genera [25-26].  
96 These slow rates of mt gene evolution have, however, increased the potential utility of mt genes  
97 for reconstructing deep phylogenetic relationships among the families and orders of Anthozoa, a  
98 group of organisms that last shared a common ancestor in the pre-Cambrian [27-28].  
99 Nonetheless, phylogenies of Anthozoa reconstructed from complete mt genomes (or their  
100 protein-coding genes) have often been incongruent with other sources of morphological and

101 phylogenomic evidence. The most notable of these discrepancies has been a lack of support for  
102 the monophyly of the anthozoan classes, Hexacorallia and Octocorallia. Mitochondrial  
103 phylogenies have often placed Octocorallia sister to the cnidarian sub-phylum Medusozoa [4, 21,  
104 29, 30], despite the very strong morphological and life-history evidence for the monophyly of  
105 Anthozoa [see 31], which has also been confirmed in several phylogenomic studies [32-33].  
106 Moreover, in some of these same analyses Hexacorallia has been recovered outside of Cnidaria,  
107 as the sister to a clade of sponges [4, 34]. Mitochondrial gene phylogenies have also recovered  
108 Ceriantharia (tube anemones) sister to the rest of Anthozoa [15, 30, 35] rather than within  
109 Hexacorallia as supported by genomic-scale studies [27-28, 32]. In addition, previous studies  
110 have suggested that Scleractinia is paraphyletic with Corallimorpharia [4, 12, 36]) and have  
111 differed from nuclear gene phylogenies in the placement of the orders Actiniaria, Zoantharia and  
112 Antipatharia and in the relationships among the major clades of Scleractinia [37-38]. Within  
113 Octocorallia, mt genes and/or genomes have provided little statistical support for the deepest  
114 nodes in either of the two major clades that have been recognized [29, 30, 39, 40].

115 Explanations that have been proposed to explain the incongruence between mt and  
116 nuclear or morphological phylogenies of Anthozoa include substitution saturation of the mt  
117 genome [21, 36, 41], rate heterogeneity between the major lineages [29], and long branch  
118 attraction (LBA) due to the combined effects of rate heterogeneity and incomplete or biased  
119 taxon sampling [34]. Most mt genome phylogenies and phylogenomic analyses of anthozoans  
120 published to date have been taxon-sparse, often omitting entire orders [29, 32, 33] or have drawn  
121 comparisons between topologies generated from completely different taxon sets [41]. As a result,  
122 it is still unclear if the source of incongruence between mt and nuclear gene phylogenies of  
123 anthozoans is simply an artifact of incomplete, biased and incomparable taxon sampling or if the

124 evolutionary signal present in anthozoan mt genomes does indeed differ from that of the nuclear  
125 genome.

126         Recent advances in phylogenomic methods and technologies have facilitated the ability  
127 to obtain complete mt genomes while simultaneously generating sequence reads for thousands of  
128 nuclear genes. In particular, target-enrichment methods used to sequence ultraconserved  
129 elements (UCEs) and exonic regions of the nuclear genome can recover complete or near-  
130 complete mt genomes as off-target reads [3]. Comparisons of mt vs nuclear gene phylogenies  
131 from the same set of taxa (often the same individuals) facilitate investigation of the causes of  
132 mito-nuclear incongruence by eliminating artifacts that may be caused by unequal or different  
133 taxon sampling.

134         In recent phylogenomic analyses of Anthozoa based on UCEs and exons [27-28],  
135 complete or near-complete mt genomes were recovered for a majority of the taxa sequenced.  
136 Here we used the complete set of mt protein-coding sequences to reconstruct the phylogenies of  
137 the Octocorallia and Hexacorallia classes and compared those to nuclear gene phylogenies  
138 generated for the same set of individuals. The dataset comprised a total of 202 species  
139 representing all orders and >50% of extant families. With this comparable dataset, the impacts of  
140 sampling biases were removed and we were able to robustly explore whether incongruence is  
141 related to evolutionary signal. New findings on the unique properties of the recovered mt  
142 genomes are also noted.

143

## 144 **Methods**

### 145 *Target-Enrichment Analyses*

146 UCE and exon loci were target enriched and bioinformatically extracted from high-  
147 throughput sequencing data as described in Quattrini et al. [42] and [27] using the anthozoa-v1  
148 baitset [42]. Briefly, raw reads were cleaned using illumiprocessor [43] and Trimmomatic v 0.35  
149 [44] and then assembled using either Spades v 3.1 ([45]; with the --careful and --cov-cutoff 2  
150 parameters) or Trinity v. 2.0 [46]. The phyluce pipeline was then used as described in the online  
151 tutorials (<https://phyluce.readthedocs.io/en/latest/tutorials/tutorial-1.html>) with some  
152 modifications (see supplemental code in 27, 42). Using phyluce, 75% and 50% taxon-occupancy  
153 matrices were created for each nuclear locus, aligned with MAFFT v7.130b [47], and loci were  
154 concatenated (*phyluce\_align\_format\_nexus\_files\_for\_raxml*) separately for hexacorals (n=108)  
155 and octocorals (n=94).

156

### 157 *Mitochondrial Genome Analyses*

158 Whole and partial mt genomes were extracted from the off-target reads in the target-  
159 enrichment sequencing data. Mitochondrial genomes were extracted and assembled in three  
160 ways. First, we used blastn to find whole or partial genomes in the Trinity or Spades assemblies  
161 and then extracted those as fasta sequences. Second, we used Novoplasty v 2.6 [48] to assemble  
162 mt genomes using the adapter-trimmed paired-end reads. Seed files were used to help assemble  
163 each species and consisted of *cox1* sequences downloaded from GenBank for the species of  
164 interest or a closely-related species. Third, Geneious Prime 2020 (<https://www.geneious.com>)  
165 was used for genomes that were difficult to assemble with Spades and Novoplasty. Individual mt  
166 loci from closely related taxa, either *mtMutS*, *cox1* or 16S, were used as seeds to initiate and  
167 guide assemblies.

168           Following mt genome assembly, fasta files were uploaded to MitoS2 ([49],  
169 <http://mitos2.bioinf.uni-leipzig.de>) for annotation (translation code=4). For further analyses, we  
170 used only species whose mt genomes were represented by at least 50% of the protein coding  
171 genes (hexacorals n=108, octacorals n=94, Suppl. Table 1), except that we included five  
172 ceriantharians with low mitogenome recovery (e.g., for 15-53% of genes recovered for each  
173 species). Protein-coding genes were then each aligned separately using MAFFT v7.130b [47]  
174 and adjusted by eye to ensure the sequences were in frame. Loci were then concatenated with  
175 *phyluce\_align\_concatenate\_alignments*. Mitochondrial genomes of hexacorals were deposited in  
176 GenBank under BioProject #XXX.

177           Some mt genomes for which we had corresponding nuclear data could not be easily  
178 assembled, or were published in previous studies, and so sequences were downloaded from  
179 GenBank and subsequently used in our analyses (Suppl. Table 1). We used mt data from  
180 GenBank for 26 hexacorals; 16 of these were of the same individuals used in our study. All  
181 octocoral mt genomes were also assembled concurrently in another study [16] and added to  
182 GenBank by those authors.

183

#### 184 *Phylogenomic Analyses*

185           Removing loci that are saturated can improve phylogenomic analyses [50]. Therefore, we  
186 ran saturation tests on each of the different locus datasets using Phylomad [51]. For nuclear loci,  
187 we ran saturation tests using models of entropy on all sites and only on those that had no missing  
188 data in each locus alignment. Datasets are denoted hereafter as LR (low risk loci) and LRM (low  
189 risk loci with no missing data in saturation test). For the mt data, we ran saturation tests on sites  
190 with no missing data for the concatenated alignment. Loci with substitution saturation were



191 removed and then various datasets were used for further phylogenetic analyses (Suppl. Table 2,  
192 Table 1).

193 Selection tests were conducted using codon-based models in codeml within PAML v. 4  
194 [52]. The one ratio model (M0) was run on the mt alignment only for both octocorals and  
195 hexacorals. This allowed us to estimate average omega ( $dN/dS$ ) and kappa ( $ts/tv$ ) values across  
196 all branches in the corresponding mt phylogenies. Omega values =1 indicate the locus is  
197 evolving neutrally, values >1 indicate positive selection and values <1 indicate negative or  
198 purifying selection. Higher kappa values indicate transition relative to transversion bias.

199 Phylogenomic analyses were conducted using maximum likelihood in IQTree v 2.1 [53]  
200 on each of the concatenated datasets (Table 1). We ran partitioned analyses on the different  
201 datasets using the best model for each locus chosen with ModelFinder [54]. Ultrafast  
202 bootstrapping (-bb 1000, [55]) and the Sh-like approximate likelihood ratio test (-alrt 1000, [56])  
203 were conducted as well as site-concordance factors [57]. A species tree analysis was also  
204 conducted using ASTRAL III v 5.7, which is statistically consistent under a multispecies  
205 coalescent model [58]. Gene trees were constructed in IQTree using the best fit model of  
206 evolution selected with ModelFinder for each gene. We used the 75% taxon-occupancy data  
207 matrices for each class. Treeshrink [59] was used to remove long branches, and the newick  
208 utility, nw\_ed, was used to remove branches with <30 % bootstrap support prior to running  
209 IQTree. Site concordance factors were also calculated on the species tree using the concatenated  
210 alignment. The phylogenetic relationship of *Renilla muelleri* to other octocorals was spuriously  
211 placed in some phylogenies. Because this species is well-supported in Pennatuloida, we pruned  
212 this species from all phylogenetic trees using the R *phytools* package [60].

213           Following phylogenetic inference, we conducted Robinson-Foulds distance (R-F, [61])  
214 tests using IQTree v2.1. R-F distances were calculated between all pairs of hexacoral unrooted  
215 trees and all pairs of octocoral unrooted trees. The two most congruent mt and nuclear trees  
216 based on maximum likelihood were determined based on the smallest R-F distances for both  
217 hexacorals and octocorals and plotted. In cases where R-F distances were the same, we chose the  
218 topology with the most bs support values > 95%. Hexacorals were rooted at the Ceriantharia  
219 based on prior phylogenomic studies of the phylum Cnidaria [32-33] and Scleralcyonacea was  
220 rooted to Malacalcyonacea based on prior phylogenomic studies [27-28, 40]. All code can be  
221 found in Suppl. File S1 and all trees and alignments can be found on figshare.

222

## 223 **Results**

### 224 *Mitogenome Assemblies*

225           Herein we assembled complete or near complete mt genomes of 75 hexacorals from the  
226 following orders: Actiniaria, Antipatharia, Ceriantharia, Corallimorpharia, and Scleractinia.  
227 Ceriantharian mt genomes were difficult to assemble. Out of five ceriantharians, none had  
228 complete mt genomes and only two genes were found for one species (*Ceriantheomorpha*  
229 *brasiliensis*). Only one species, *Botruanthus mexicanus*, had a near complete genome assembly.  
230 We confirmed the presence of Group I introns (Suppl. Table 3) in many taxa. In Actiniaria,  
231 Antipatharia, Zoantharia, and *Relicanthus daphneae*, two protein coding genes, *nad1* and *nad3*,  
232 were found inserted as introns within *nad5*. Ten protein coding genes were found in the *nad5*  
233 intron of most scleractinians, with the exception of *Caryophyllia arnoldi* in which we found only  
234 seven protein-coding genes and *rns* within the *nad5* intron. In Corallimorpharia, 10 protein-  
235 coding genes were in the *nad5* intron of *Corallimorphus profundus*, and for the rest of the

236 corallimorpharians (*Rhodactis osculifera*, *Discosoma carlgreni*, and *Ricordea florida*), all genes  
237 but *trnW* were in the *nad5* intron. Another group 1 intron that encodes a homing endonuclease  
238 from the LAGLI-DADG family was present in *cox1* of some hexacorals. We confirmed the  
239 presence of this endonuclease in 24% of actinarians, 28% of scleractinians, 17% of  
240 antipatharians, and 100% of corallimorpharians (Suppl. Table 3). We also documented this  
241 intron in two species of Ceriantharia, *Botruanthus mexicanus* and *Ceriantheomorpha*  
242 *brasiliensis*.

243         Of the complete (or near complete) mt genomes of hexacorals assembled in this study,  
244 only three species displayed gene order rearrangements relative to other taxa in their respective  
245 orders (Suppl. Table 3). Within Actiniaria, only one species sequenced, *Alicia sansibarensis*,  
246 exhibited a mt genome rearrangement with *cox2-nad4-nad6-cob* inserted prior to *atp8* instead of  
247 between *nad6* and *rns*. Of the scleractinians, *Caryophyllia arnoldi* had a genome rearrangement  
248 with the *cob-nad2-nad6* gene block inserted after the 3' end of *nad5* instead of within the *nad5*  
249 intron. The mt genome of *Madrepora oculata* also had a gene rearrangement, with a switch in  
250 the order of *cox2* and *cox3* compared to all other scleractinians. *Corallimorphus profundus* also  
251 had a different genome rearrangement compared to *R. osculifera*, *D. carlgreni*, and *R. florida*  
252 (Suppl. Fig. 3). *Corallimorphus profundus* had 10 protein-coding genes and *rns* within the *nad5*  
253 intron. In contrast, *R. osculifera*, *D. carlgreni* and *R. florida* have all other genes but *trnW* within  
254 the *nad5* intron.

255

#### 256 *Alignment Summary*

257         For hexacorals, concatenated nuclear locus alignments across 50-75% taxon-occupancy  
258 datasets ranged from 38,534 to 246,027 bp with 95 to 756 loci in each dataset (Table 1). For each

259 hexacoral species, locus recovery ranged from 303 to 1,156, with overall few loci (342 to 589)  
260 recovered in ceriantharians (Suppl Table 1). For octocorals, concatenated nuclear locus  
261 alignments across 50-75% taxon-occupancy datasets ranged from 213,477 to 555,701 bp with  
262 408 to 1,252 loci (Table 1). For each octocoral species, 604 to 1,275 loci were recovered (Suppl.  
263 Table 1).

264 All 13 protein-coding genes were included in the alignment for 79% of all hexacoral  
265 species (Suppl. Tables 1 and 3). The hexacoral mt genome alignment containing the 13 protein-  
266 coding genes was 12,465 bp, and for each gene at least 94-98% of the species were represented.  
267 For octocorals, all 14 protein-coding genes were included in the alignment for 80% of species.  
268 The octocoral mt genome alignment was 16,176 bp, and for each gene 96-100% of the species  
269 were represented, except for *mtMutS*. *mtMutS* was included for only 77% of the species as for  
270 some species it was highly incomplete or highly divergent from the other species.

271 Selection tests on the mt genome alignments indicated that the mt genomes are under  
272 strong purifying selection. The omega value ( $dN/dS$ ) for hexacorals was 0.10 while the value for  
273 octocorals was 0.14. The kappa value (ts/tv) for hexacorals was 2.7, whereas in octocorals it was  
274 higher at 3.9. Saturation tests conducted using PhyloMad indicated that neither the hexacoral nor  
275 octocoral mt alignment was under saturation as indicated by entropy tests (Suppl. Fig. 1, Suppl.  
276 Table 2). For nuclear-locus datasets, 8-50% of the loci in each dataset had a high risk of  
277 substitution saturation. Hexacorals tended to have more saturated loci, with 30-50% saturated  
278 loci per dataset whereas octocorals had a lower number, with 8-35% of saturated loci per dataset.

279

280 *Mito-nuclear Discordance*

281 Hexacorallia

282 Overall, all phylogenies constructed for Hexacorallia were well supported (Table 1).  
283 Among all nuclear trees constructed with ASTRAL and IQTree, 83 to 97% of nodes (106 total  
284 nodes) on each tree had higher than 95% ultrafast bootstrap (bs) values, posterior probabilities  
285 (pp), and SH-aLRT values. Similarly, the mt genome tree was well supported with 78-89% of  
286 nodes having higher than 95% ultrafast bs values and SH-aLRT values.

287 There were some differences among all hexacoral phylogenies, but nuclear phylogenies  
288 constructed with ASTRAL and IQTree were mostly congruent with one another (pairwise R-F  
289 distances=4-28). The R-F distances between the hexacoral mt genome tree and the nuclear trees,  
290 however, were much larger, ranging from 56 to 68. The mt genome tree was most similar to the  
291 ASTRAL species trees (pairwise R-F distances=56-60) compared to the maximum likelihood  
292 phylogenies (pairwise R-F distances=62-66); there were three maximum likelihood phylogenies  
293 that were all equally congruent with the mt genome phylogeny (RF distances=62). The tree with  
294 50% data occupancy and highly saturated loci removed (50LR) while allowing for missing data  
295 in the saturation test had the highest BS support values. There were a few species on long  
296 branches in the mt genome tree, but not the nuclear tree, including the zoantharians  
297 *Nanozoanthus harenaceus* and *Microzoanthus occultus* and the scleractinian *Paraconotrochus*  
298 *antarcticus* (see Suppl. Files).

299 Although there were several differences among shallow nodes in all topologies, two  
300 major differences were apparent at deep nodes (Fig. 1). First, the relationship of Zoantharia and  
301 Actiniaria to other orders differed among topologies. In the mt genome tree, Actiniaria was sister  
302 to all other hexacoral orders except Ceriantharia (bs=100, SHaLRT=100, sCF=82). This same  
303 relationship was also recovered in the ASTRAL species trees (bs=100, SHaLRT=100, sCF=54-  
304 56) and the 75LRM tree (bs=100, SHaLRT=100, sCF=56, Fig. 1, see Suppl. Files) analyses of

305 the nuclear dataset. In contrast, in the majority of maximum likelihood trees for the nuclear  
306 dataset, *Zoantharia* diverged earlier than Actiniaria (bs=100, SHaLRT=100, pp=100, sCF=52-  
307 84). Second, the relationship of *Relicanthus daphneae* to other orders differed among  
308 phylogenies. In the mt genome phylogeny, *R. daphneae* was sister to the zoantharians (UF=88,  
309 SHaLRT=77, sCF=42). In the majority of nuclear phylogenies, *R. daphneae* was recovered with  
310 variable support (bs >84, SHaLRT >75, pp>41, sCF >32), as sister to Antipatharia-  
311 Corallimorpharia-Scleractinia.

312         There were also some differences between mt genome and nuclear phylogenies within  
313 each hexacoral order. Within Scleractinia, there were differences among trees at the shallow  
314 nodes, including relationships among species of *Porites* (S4 clade), but the major difference was  
315 the placement of the family Micrabaciidae (S1). Nuclear phylogenies all strongly support that  
316 this family is sister to the Robust/Vacatina clade (S2) of Scleractinia (bs=100, SHaLRT=100,  
317 pp=97-100, sCF=37-40). In contrast, in the mt genome phylogeny Micrabaciidae (S1) was  
318 recovered as sister to all other Scleractinia (S2+S3) with strong support (bs=100, SHaLRT=99,  
319 sCF=33). Within Actiniaria, the position of the superfamily Actinostoloidea (A2) differed  
320 between mt genome and nuclear phylogenies. This superfamily was sister to the superfamilies  
321 Metridioidea+Actinioidea (A4+A3) in the mt genome phylogeny (bs=100, SHaLRT=100,  
322 sCF=48.6) whereas it was sister to the superfamily Actinioidea (A3) in all nuclear phylogenies  
323 (bs=100, SHaLRT=99-100, pp=100, sCF=37-38). Within Antipatharia, the position of  
324 *Acanthopathes thyoidea* (A3) differed between mt genome and nuclear phylogenies. This species  
325 was sister to all other antipatharians (An1+An2) in the mt genome phylogeny (bs=100,  
326 SHaLRT=100, sCF=72) whereas it was sister to the family Schizopathidae (An2) in the majority  
327 of nuclear phylogenies (bs=76-100, SHaLRT=23-100, pp=91-98, sCF=34-37), except for the

328 50LRM and ASTRAL LRM topologies (bs=100, SHaLRT=100, pp=100, sCF=65-67), which  
329 matched the mt genome tree. Within Zoantharia, the placement of *Epizoanthus illoricatus* (Z2)  
330 and *Neozoanthus* aff. *uchina* (Z4 in part) differed among mt genome and nuclear phylogenies. In  
331 the mt genome tree, *E. illoricatus* (Z2) was sister to the rest of the zoantharians (bs=100,  
332 SHaLRT=100, sCF=66), whereas in all nuclear phylogenies, *Nanozoanthus harenaceus* and  
333 *Microzoanthus occultus* (Z1) were sister to the rest of the zoantharians (bs=100, SHaLRT=100,  
334 pp=100, sCF=37-38). *Neozoanthus* aff. *uchina* (Z4 in part) was sister to the family Zoanthidae  
335 (Z5) in the mt genome phylogeny (bs=100 SHaLRT=100, sCF=49) whereas it was sister to  
336 *Hydrozoanthus gracilis* (Z4) in all nuclear phylogenies (bs=100 SHaLRT=100, pp=100,  
337 sCF=48-51). Within Corallimorpharia, there were differences within the Discosomidae family  
338 (C1) with *R. osculifera* sister to *D. carlgreni* in the nuclear phylogeny yet sister to the remaining  
339 discosomids in the mt genome phylogeny.

340

#### 341 Octocorallia

342 Nuclear gene phylogenies for Octocorallia were in general well supported. Among all  
343 nuclear trees constructed with ASTRAL and IQTree, 83 to 96% of nodes (91 total nodes) on  
344 each tree had higher than 95% ultrafast bootstrap (bs) values, posterior probabilities (pp), and  
345 SH-aLRT values. In contrast, mt genome trees for Octocorallia were not as well supported with  
346 only 76% of nodes having higher than 95% ultrafast bs and SHaLRT values.

347 Nuclear phylogenies constructed with ASTRAL and IQTree were somewhat congruent  
348 with one another (pairwise R-F distances=4-36, Table 2, see Suppl. Files). The R-F distances  
349 between the octocoral mt genome tree and the nuclear trees, however, were much larger, ranging  
350 from 60 to 72. Octocoral mt genome trees were somewhat more similar to the maximum



351 likelihood phylogenies (pairwise R-F distances=60-68) as compared to the ASTRAL trees  
352 (pairwise R-F distances=68-72). The most similar tree to the mt genome phylogeny was  
353 constructed with a 75% taxon occupancy data matrix with highly saturated loci removed and no  
354 missing data in the saturation test (75LRM). In general, branch lengths were much different  
355 between mt genome and nuclear trees. In the mt genome tree, seven species were on very long  
356 branches (*Muricella* sp., *Leptophyton benayahu*, *Tenerodus fallax*, *Cornularia pabloi*,  
357 *Pseudoanthomastus* sp., *Erythropodium caribaeorum*, and *Melithaea erythraea*), a pattern not  
358 recovered in nuclear phylogenies (see Suppl. Files).

359       Numerous differences were apparent among the octocoral mt genome and nuclear  
360 phylogenies (Fig. 2). Within the order Scleralcyonacea, the placement of  
361 Pennatuloidae+Ellisellidae (clade S1) differed. In the mt genome tree this clade was sister to the  
362 Keratoisididae+Primnoidae+Chrysogorgiidae (S2) and Helioporidae (S3) clades (bs=90,  
363 SHaLRT=100, sCF=29). In two maximum likelihood trees (50, 50LRM) and all ASTRAL trees  
364 (bs=100, SHaLRT=100, pp=93-100, sCF=36), it was sister either to clades S3+S4 (bs=53-100,  
365 SHaLRT=25-99, sCF=33-36) or to clades S2+S3+S4. *Cornularia pabloi* also changed positions,  
366 diverging later (sister to clade S3) in the mt genome phylogeny (bs=90, SHaLRT=95, sCF=28)  
367 as compared to all nuclear phylogenies where it was placed sister to all other scleralcyonaceans  
368 (bs=100, SHaLRT=100, pp=100, sCF=37). *Parasphaerasclera valdiviae* was an early-diverging  
369 lineage and sister to all other scleralcyonaceans in the mt genome phylogeny (bs=100,  
370 SHaLRT=100, sCF=63) whereas it was sister to family Coralliidae in the nuclear phylogeny  
371 (bs=100, SHaLRT=100, pp=100, sCF=37). Helioporidae (S3) was recovered as sister to clade S4  
372 in the maximum likelihood nuclear phylogenies (bs=99-100, SHaLRT=99, sCF=36) but sister to  
373 clade S2 in the mt genome phylogeny (bs=90, SHaLRT=97, sCF=34) and the ASTRAL



374 phylogenies, although the relationships in the species trees were poorly to moderately supported  
375 (pp=0.5-86, sCF=34). Family Keratoisididae was recovered as sister to Primnoidae in the mt  
376 genome phylogeny (bs=94, SHaLRT=96, sCF=32) and in one nuclear phylogeny (50LRM) but  
377 with poor support (bs=79, SHaLRT=47, sCF=32). In all other nuclear phylogenies,  
378 Keratoisididae was recovered sister to Chrysogorgiidae (bs=100, SHaLRT=100, pp=90-100,  
379 sCF=36-37).

380         Within Malacalcyonacea, several differences among phylogenetic relationships were  
381 noted, including some relationships among congeneric species. The  
382 Incrustatidae+Malacacanthidae clade was an early-diverging lineage and sister to most  
383 malacalcyonacean families (except for *Clavularia inflata*) in the mt genome tree (bs=100,  
384 SHaLRT=100, sCF=50), but these families diverged later as part of the M2 clade in the nuclear  
385 phylogenies. The Tubiporidae+Arulidae clade (M1) was sister to all malacalcyonaceans (except  
386 for *C. inflata*) in the nuclear phylogeny (75LRM). In the mt genome phylogeny, it included  
387 *Nidalia* and was sister to the Sarcophytidae+Carijoidae (clade M3a, bs=72, SHaLRT=86,  
388 sCF=32). An Anthogorgiidae+Eunicellidae+Plexaurellidae clade (M8a) was sister to  
389 Paramuriceidae (M8c) in the mt genome phylogeny (bs=99, SHaLRT=95, sCF=35). In contrast,  
390 the Keroeidae+Taiaroidae+Astrogorgiidae clade (M8b) was sister to the Paramuriceidae (M8c)  
391 in the nuclear phylogenies (bs=99-100, SHaLRT=99-100, pp=100, sCF=34-42). Within  
392 Sarcophytidae, relationships differed among species between mt genome and nuclear  
393 phylogenies.

394

## 395 **Discussion**

### 396 *Mitochondrial Genome Properties*

397 Utilizing a total of 202 complete or near-complete mitochondrial (mt) genomes, we were  
398 able to examine mito-nuclear discordance within the Anthozoa and explore the unique mt  
399 genome properties of all orders belonging to this sub-phylum of Cnidaria. In addition to the mt  
400 genomes newly assembled here, most of the previously published mt genomes [16, 38, 62] that  
401 we included in our analyses had been assembled from the raw sequence data from Quattrini et al.  
402 [27, 42]. This large dataset of mt genomes further demonstrates the utility of off-target reads  
403 generated from target-capture data for the assembly of mt genomes and adds to the growing  
404 knowledge of mt genome evolution within the sub-phylum Anthozoa.

405 Although group I introns have been previously recorded in hexacorals [10-14, 62-65], we  
406 note their pervasiveness across the group. A *nad5* intron of at least two protein-coding genes and  
407 up to all 13 is present in the majority of hexacoral families. From our data, it also appears that  
408 this intron is present in Ceriantharia, however, this needs further confirmation as we had  
409 difficulties assembling mt genomes in that order. The other group I intron that encodes a homing  
410 endonuclease from the LAGLI-DADG family is present in *cox1* in many hexacorals. Both gains  
411 and/or losses of this gene have been previously noted in the hexacoral orders, Scleractinia [13],  
412 Corallimorpharia [64], Actiniaria [65], and Zoantharia [62]. This endonuclease appears to be  
413 more common in some orders (Zoantharia, Corallimorpharia) than others (Scleractinia). Based  
414 on annotation from MitoS2, we also documented this intron in two ceriantharians. To our  
415 knowledge, this intron has not yet been documented in the order Ceriantharia. Based on its  
416 distribution across the phylogeny, the homing endonuclease, likely a result of horizontal  
417 transmission [13], has been gained and lost within Hexacorallia for several hundred million  
418 years, with origins dating to 300-400 MYA [27]. To date, no introns have been recorded from  
419 the Octocorallia.

420 Mitochondrial genome rearrangements within Anthozoa have been a topic of interest for  
421 over two decades, as species in this sub-phylum exhibit several gene order changes. However,  
422 within hexacorals, genome rearrangements are seemingly rare. Of the 102 complete (or near  
423 complete) mt genomes of hexacorals examined in this study, only 7% displayed gene order  
424 rearrangements relative to the canonical gene order within their taxonomic order; many of which  
425 have been described in prior studies [e.g., 12, 65, 66]. In contrast to hexacorals, octacorals have  
426 undergone gene rearrangements more frequently across their phylogenetic history [18-21, 67].  
427 Of the 92 complete to near complete octocoral mt genomes used in this study, 21% had gene  
428 rearrangements. Brockman and McFadden [20] suggested that octocoral gene rearrangements  
429 evolve via inversions of conserved gene blocks (or intramolecular recombination) whereas  
430 hexacoral gene rearrangements are likely caused by gene shuffling. Additionally, they  
431 hypothesized that the presence of the mt mis-match repair protein, *mtMutS* (unique to  
432 Octacorallia) might play a role in mediating these gene inversions. A recent review by Johansen  
433 and Emblem [68] suggested that the large *nad5* intron that is ubiquitous in hexacorals (but absent  
434 from octacorals) perhaps stabilizes mt genome organization in that class. With the increasing  
435 availability and decreasing costs of high-throughput sequencing combined with new analytical  
436 methods for assembling and annotating mt genomes (e.g., MitoFinder, [3]), many new  
437 discoveries likely await regarding the mt genome evolution of anthozoan cnidarians.

438

#### 439 *Mito-nuclear Discordance*

440 Advances in genomic approaches have also facilitated comparisons of the phylogenetic  
441 histories of nuclear and mt genomes. This has allowed us to explore the patterns and underlying  
442 causes of mito-nuclear discordance. In both Hexacorallia and Octacorallia, we found a high-

443 degree of mito-nuclear discordance at every level (i.e., order to species) even when comparing  
444 the mt phylogeny to the most similar nuclear phylogeny. At deep nodes in the phylogenies, the  
445 most apparent differences in the hexacoral phylogenies included the positions of the anemone  
446 groups Actiniaria, Zoantharia, and *R. daphneae*. Within octocorals, the most apparent differences  
447 at deep nodes were relationships among clades within the order Scleralcyonacea and among the  
448 early-diverging lineages within Malacalcyonacea. Discordance at deep nodes complicates  
449 interpretations of ancestral state reconstructions through deep time. In addition, this level of  
450 discordance causes concern for using just one source of sequence data (i.e. nuclear or whole mt  
451 genomes) for phylogenetic reconstruction, but also highlights how different datasets used in  
452 compliment present a unique opportunity to better understand the cause of the discordance from  
453 an evolutionary perspective.

454         Substitution saturation of mt genomes has been suggested to be the cause of mito-nuclear  
455 discordance in anthozoans [21,41]. Using entropy tests on our extensive dataset of ~100  
456 genomes in each class, we did not find evidence for substitution saturation. The entropy-based t  
457 statistic tests saturation on phylogenetically informative sites, is suitable for assessing misleading  
458 tree topologies, and it has several advantages, including: 1) it is robust across a range of  
459 confounding factors, including rate variation across sites; and 2) the negative influence of  
460 slowly-evolving sites is removed in the measurement of overall base composition [50]. Thus, our  
461 results might differ from prior studies that used other methods, particularly if slowly-evolving  
462 sites were not taken into account. Alternatively, the different results could be driven by the  
463 number (2-3X less) and choice of taxa used in prior phylogenetic studies. In contrast to mt  
464 genomes, we found that ~10 to 50% of UCE and exon nuclear loci were saturated, depending on  
465 dataset. A recent study examining substitution saturation of UCE and exon loci across a range of

466 taxa (e.g., hymenopterans, fishes, and crustaceans), also found similar numbers of saturated loci  
467 [50]. We removed UCE and exon loci with substitution saturation from the dataset prior to  
468 phylogenetic analysis, yet even so, the nuclear and mt topologies were quite incongruent.  
469 Therefore, substitution saturation is not the primary cause of the observed discordance among  
470 nuclear and mt phylogenies.

471         Introgression is another biological process that can result in discordance among nuclear  
472 and mt phylogenies. Within Anthozoa, introgressive hybridization has been suggested to be an  
473 important mechanism in generating species diversity [71-77]. Because mt genomes are  
474 maternally inherited and non-recombining, species or groups of species that have undergone past  
475 hybridization might be expected to have mt genomes that are more similar than their nuclear  
476 genomes [e.g., 78-79]. Using D-statistics and ABBA BABA tests, Quattrini et al. [75]  
477 determined that hybridization is an important mechanism in shaping diversity within the soft  
478 octocoral genus *Sclerophytum* (= *Sinularia*). Similarly, hybridization has been noted within  
479 multiple species in the scleractinian genus *Porites* [76-77]. Indeed, we found strong  
480 incongruence between mt and nuclear phylogenies within both genera. In combination, these  
481 results suggest that introgression might explain some of the incongruence, at least at the tips of  
482 the trees. Mitochondrial introgression is more likely and happens at a faster rate than nuclear  
483 introgression, cautioning the use of mt gene trees as accurate depictions of a species trees [79].  
484 Future studies should consider explicitly testing for mt introgression in pairs or groups of taxa  
485 using, for example, ABBA-BABA tests and isolation with migration models [e.g., 80].

486         Studies that have tested for introgressive hybridization as a cause of discordance among  
487 mt and nuclear phylogenies have often focused on closely related species groups that have  
488 diverged in the recent past [e.g., 6, 8, 81-82]. Whether or not hybridization is the cause of

489 incongruent relationships at nodes deeper in a phylogeny is more difficult to discern. However,  
490 ancient introgression of ghost lineages (e.g., extinct, unknown or unsampled lineages that remain  
491 in extant species likely due to ancient hybridization; [83]) could play a role in generating  
492 incongruence. Li and Wu [84] hypothesized that species with widespread distributions are likely  
493 to contain genetic components of ghost lineages. Marine invertebrates, such as anthozoans, fit  
494 that category. The case of the enigmatic giant deep-sea anemone *Relicanthus* particularly fits this  
495 scenario, so far being the only representative of its kind within hexacorals. We urge future  
496 research on ghost lineages and the potential for ancient introgression to drive some of the  
497 topological incongruence in Anthozoa. Notably, the deep divergences of sea anemone groups  
498 within hexacorals and the deep divergences within both orders of octocorals were the most  
499 unstable nodes and require further scrutiny.

500         The slow-evolutionary rate of mt genomes in anthozoans [24, 79] could also be partly  
501 responsible for the extreme mito-nuclear discordance seen here. Shearer et al. [79] hypothesized  
502 that background selection is influencing the slow substitution rates within mt genomes of  
503 anthozoans. Due to non-recombining mt loci, selection reduces variation not only at sites under  
504 selection, but at those that are linked as well [85]. We found that the mt genome is under strong  
505 purifying selection in both Hexacorallia and Octocorallia, with omega values close to zero in  
506 both classes. Another recent study found that some genes are under relaxed purifying selection in  
507 deep-sea taxa, with some sites in particular genes under positive selection [86]. We were not  
508 able to test for selection on nuclear loci, as none were in correct reading frames. However,  
509 because of the large number of loci used, we would not anticipate that all or even most nuclear  
510 loci would evolve under the same type of selection.

511

512 *Summary*

513 Our results have demonstrated extreme mito-nuclear discordance in Anthozoa. Overall,  
514 non-recombining mt genomes that do not evolve neutrally and are likely to rapidly introgress are  
515 most likely influencing our ability to reconstruct accurate species relationships. Other studies  
516 have cautioned against the use of mtDNA for resolving phylogenetic relationships in anthozoans  
517 [21, 41] and even more broadly in metazoans [1], but unequal taxon sampling and non-matching  
518 tips have always been potential confounding issues in mito-nuclear comparisons. We included  
519 the same tips in the mt and nuclear phylogenies and sampled widely across all orders.  
520 Nonetheless, it is still possible that inadequate taxon sampling could influence the patterns of  
521 mito-nuclear discordance we observed, and that including more taxa in particular regions of the  
522 trees would stabilize some relationships. Even so, mito-nuclear discordance in hexacorals and  
523 octocorals is not an artifact of biased and incomparable taxon sampling, but instead, a signal of  
524 evolutionary processes that have shaped the genetic diversity of Anthozoa.

525

526 **References**

- 527 1. Ballard, J. W. O., & Whitlock, M. C. The incomplete natural history of  
528 mitochondria. *Mol. Ecol.* **13(4)**, 729-744 (2004).
- 529 2. Janiak, M. C. *et al.* 205 newly assembled mitogenomes provide mixed evidence for  
530 rivers as drivers of speciation for Amazonian primates. *Mol. Ecol.* (2022)
- 531 3. Allio, R. *et al.* MitoFinder: efficient automated large-scale extraction of mitogenomic  
532 data in target enrichment phylogenomics. *Mol. Ecol. Res.*, **20(4)**, 892-905 (2020)

- 533 4. Xiao, M *et al.* Mitogenomics suggests a sister relationship of *Relicanthus daphneae*  
534 (Cnidaria: Anthozoa: Hexacorallia: *incerti ordinis*) with Actiniaria. *Sci. Rep.*, **9(1)**, 1-10.  
535 (2019).
- 536 5. Brown, W.M., George, M. & Wilson, A. C. Rapid evolution of animal mitochondrial  
537 DNA. *Proc. Natl. Acad. Sci. U.S.A.* **76**, 1967–1971 (1979).
- 538 6. Platt, R. N. *et al.* Conflicting evolutionary histories of the mitochondrial and nuclear  
539 genomes in new world *Myotis* bats. *Syst. Biol.* **67**, 236–249 (2018).
- 540 7. Tamashiro, R. A. *et al.* What are the roles of taxon sampling and model fit in tests of  
541 cyto-nuclear discordance using avian mitogenomic data? *Mol. Phylogenet. Evol.* **130**,  
542 132–142 (2019).
- 543 8. Kimball, R. T., Guido, M., Hosner, P. A. & Braun, E.L. When good mitochondria go bad:  
544 Cyto-nuclear discordance in landfowl (Aves: Galliformes). *Gene*. **801**, 145841 (2021).
- 545 9. Lavrov, D. V. & Pett, W. Animal mitochondrial DNA as we do not know it: mt-genome  
546 organization and evolution in nonbilaterian lineages. *Genome. Biol. Evol.* **8**, 2896–2913  
547 (2016).
- 548 10. Beagley, C. T., Okada, N. A., & Wolstenholme, D. R. (1996). Two mitochondrial group I  
549 introns in a metazoan, the sea anemone *Metridium senile*: one intron contains genes for  
550 subunits 1 and 3 of NADH dehydrogenase. *PNAS*, *93*(11), 5619-5623.
- 551 11. van Oppen, M. J., Catmull, J., McDonald, B. J., Hislop, N. R., Hagerman, P. J., & Miller,  
552 D. J. The mitochondrial genome of *Acropora tenuis* (Cnidaria; Scleractinia) contains a  
553 large group I intron and a candidate control region. *J. Mol. Evol.* **55(1)**, 1 (2002).
- 554 12. Medina, M., Collins, A. G., Takaoka, T. L., Kuehl, J. V. & Boore, J. L. Naked corals:  
555 Skeleton loss in Scleractinia. *PNAS*. **103**, 9096–9100 (2006).



- 556 13. Fukami, H., Chen, C. A., Chiou, C. Y., & Knowlton, N. Novel group I introns encoding a  
557 putative homing endonuclease in the mitochondrial *cox1* gene of Scleractinian corals. *J.*  
558 *Mol. Evol.* **64**, 591-600 (2007).
- 559 14. Brugler, M. R., & France, S. C. The complete mitochondrial genome of the black coral  
560 *Chrysopathes formosa* (Cnidaria: Anthozoa: Antipatharia) supports classification of  
561 antipatharians within the subclass Hexacorallia. *Mol. Phylogenet. Evol.* **42**, 776-788  
562 (2007).
- 563 15. Stampar, S. N. *et al.* Linear mitochondrial genome in Anthozoa (Cnidaria): A case study  
564 in Ceriantharia. *Sci Rep.* **9**, 6094 (2019).
- 565 16. Muthye, V., Mackereth, C. D., Stewart, J. B. & Lavrov, D. V. Large dataset of octocoral  
566 mitochondrial genomes provides new insights into *mt-mutS* evolution and function. *DNA*  
567 *Repair (Amst).* **110** (2022).
- 568 17. Bilewitch, J. P., & Degnan, S. M. A unique horizontal gene transfer event has provided  
569 the octocoral mitochondrial genome with an active mismatch repair gene that has  
570 potential for an unusual self-contained function. *BMC Evol. Biol.*, **11**, 1-15 (2011)
- 571 18. Hogan, R. I., Hopkins, K., Wheeler, A. J., Allcock, A. L. & Yesson, C. Novel diversity in  
572 mitochondrial genomes of deep-sea Pennatulacea (Cnidaria: Anthozoa: Octocorallia).  
573 *Mitochondrial DNA Part A.* **30**, 764–777 (2019).
- 574 19. Uda, K. *et al.* Complete mitochondrial genomes of two Japanese precious corals,  
575 *Paracorallium japonicum* and *Corallium konojoi* (Cnidaria, Octocorallia, Coralliidae):  
576 Notable differences in gene arrangement. *Gene.* **476**, 27–37 (2011).
- 577 20. Brockman, S. A. & McFadden, C. S. The mitochondrial genome of *Paraminabea*  
578 *aldersladei* (Cnidaria: Anthozoa: Octocorallia) supports intramolecular recombination as

- 579 the primary mechanism of gene rearrangement in octocoral mitochondrial genomes.  
580 *Genome. Biol. Evol.* **4**, 994–1006 (2012).
- 581 21. Figueroa, D. F. & Baco, A. R. Octocoral mitochondrial genomes provide insights into the  
582 phylogenetic history of gene order rearrangements, order reversals, and cnidarian  
583 phylogenetics. *Genome. Biol. Evol.* **7**, 391–409 (2015).
- 584 22. Brown, W. M., Prager, E. M., Wang, A. & Wilson, A. C. Mitochondrial DNA sequences  
585 of primates: Tempo and mode of evolution. *J. Mol. Evol.* **18**, 225–239 (1982).
- 586 23. Vawter, L. & Brown, W. M. Nuclear and mitochondrial DNA comparisons reveal  
587 extreme rate variation in the molecular clock. *Science*. **234**, 194–196 (1986).
- 588 24. Hellberg, M. E. No variation and low synonymous substitution rates in coral mtDNA  
589 despite high nuclear variation. *BMC Evol. Biol.* **6**, 24 (2006).
- 590 25. Shearer, T. L. & Coffroth, M. A. DNA Barcoding: Barcoding corals: limited by  
591 interspecific divergence, not intraspecific variation. *Mol. Ecol Res.* **8**, 247–255 (2008).
- 592 26. Huang, D., Meier, R., Todd, P. A. & Chou, L. M. Slow mitochondrial COI sequence  
593 evolution at the base of the metazoan tree and its implications for DNA barcoding. *J.*  
594 *Mol. Evol.* **66**, 167–174 (2008).
- 595 27. Quattrini, A. M. *et al.* Palaeoclimate ocean conditions shaped the evolution of corals and  
596 their skeletons through deep time. *Nat. Ecol. Evol.* **4**, 1531–1538 (2020).
- 597 28. McFadden, C. S. *et al.* Phylogenomics, origin, and diversification of anthozoans (Phylum  
598 Cnidaria). *Syst Biol.* **70**, 635–647 (2021).
- 599 29. Park, E. *et al.* Estimation of divergence times in cnidarian evolution based on  
600 mitochondrial protein-coding genes and the fossil record. *Mol. Phylogenet. Evol.* **62**,  
601 329–345 (2012).

- 602 30. Kayal, E., Roure, B., Philippe, H., Collins, A. G. & Lavrov, D. V. Cnidarian phylogenetic  
603 relationships as revealed by mitogenomics. *BMC Evol. Biol.* **13**, 5 (2013).
- 604 31. Daly, M. *et al.* The phylum Cnidaria: A review of phylogenetic patterns and diversity 300  
605 years after Linnaeus. *Zootaxa.* **1668**, 127–182 (2007).
- 606 32. Zapata, F. *et al.* Phylogenomic analyses support traditional relationships within Cnidaria.  
607 *PLoS One.* **10**, e0139068; 10.1371/journal.pone.0139068. (2015).
- 608 33. Kayal, E. *et al.* Phylogenomics provides a robust topology of the major cnidarian lineages  
609 and insights on the origins of key organismal traits. *BMC Evol. Biol.* **18**, 68 (2018).
- 610 34. Osigus, H-J., Eitel, M., Bernt, M., Donath, A. & Schierwater, B. Mitogenomics at the  
611 base of metazoa. *Mol. Phylogenet. Evol.* **69**, 339–351 (2013).
- 612 35. Stampar, S. N., Maronna, M. M., Kitahara, M. V., Reimer, J. D. & Morandini, A. C. Fast-  
613 evolving mitochondrial DNA in Ceriantharia: A reflection of Hexacorallia paraphyly?  
614 *PLoS One.* **9**, e86612; 10.1371/journal.pone.0086612 (2014).
- 615 36. Kitahara, M. V. *et al.* The “Naked Coral” hypothesis revisited – Evidence for and against  
616 Scleractinian monophyly. *PLoS One.* **9**, e94774; 10.1371/journal.pone.0094774 (2014).
- 617 37. Seiblit, I. G. L. *et al.* The earliest diverging extant scleractinian corals recovered by  
618 mitochondrial genomes. *Sci. Rep.* **10**, 20714; 10.1038/s41598-020-77763-y (2020).
- 619 38. Stolarski, J. *et al.* A modern scleractinian coral with a two-component calcite–  
620 aragonite skeleton. *PNAS*, **118(3)**, e2013316117 (2021).
- 621 39. McFadden, C. S., France, S. C., Sánchez, J. A. & Alderslade, P. A molecular  
622 phylogenetic analysis of the Octocorallia (Cnidaria: Anthozoa) based on mitochondrial  
623 protein-coding sequences. *Mol. Phylogenet. Evol.* **41**, 513–527 (2006).

- 624 40. McFadden, C. S., van Ofwegen, L. P. & Quattrini, A. M. Revisionary systematics of  
625 Octocorallia (Cnidaria: Anthozoa) guided by phylogenomics. *Bull. Syst. Biol.* **1**, 8735;  
626 <https://doi.org/10.18061/bssb.v1i3.8735> (2022).
- 627 41. Pralong, M., Rancurel, C., Pontarotti, P. & Aurelle, D. Monophyly of Anthozoa  
628 (Cnidaria): Why do nuclear and mitochondrial phylogenies disagree? *Zool Scr.* **46**, 363–  
629 371 (2016).
- 630 42. Quattrini, A. M., *et al.* Universal target-enrichment baits for anthozoan (Cnidaria)  
631 phylogenomics: New approaches to long-standing problems. *Mol. Ecol. Resour.* **18**, 281–  
632 295 (2018).
- 633 43. Faircloth, B. C. Illumiprocessor: a trimmomatic wrapper for parallel adapter and quality  
634 trimming. [10.6079/J9ILL](https://doi.org/10.6079/J9ILL) (2013).
- 635 44. Bolger, A. M., Lohse, M. & Usadel, B. Trimmomatic: a flexible trimmer for Illumina  
636 sequence data. *Bioinformatics.* **30**, 2114–2120 (2014).
- 637 45. Bankevich, A. *et al.* SPAdes: A new genome assembly algorithm and its applications to  
638 single-cell sequencing. *J. Comput. Biol.* **19**, 455–477 (2012).
- 639 46. Haas, B. J. *et al.* De novo transcript sequence reconstruction from RNA-seq using the  
640 Trinity platform for reference generation and analysis. *Nat Protoc.* **8**, 1494–1512 (2013).
- 641 47. Katoh, K. & Standley, D. M. MAFFT multiple sequence alignment software version 7:  
642 Improvements in performance and usability. *Mol Biol Evol.* **30**, 772–780 (2013).
- 643 48. Dierckxsens, N., Mardulyn, P. & Smits, G. NOVOPlasty: *de novo* assembly of organelle  
644 genomes from whole genome data. *Nucleic Acids Res.* **45**, e18; [10.1093/nar/gkw955](https://doi.org/10.1093/nar/gkw955)  
645 (2016).

- 646 49. Donath, A. *et al.* Improved annotation of protein-coding genes boundaries in metazoan  
647 mitochondrial genomes. *Nucleic Acids Res.* **47**, 10543–10552 (2019).
- 648 50. Duchêne, D. A., Mather, N., van der Wal, C. & Ho, S. Y. W. Excluding loci with  
649 substitution saturation improves inferences from phylogenomic data. *Syst Biol.* **71**, 676–  
650 689 (2021).
- 651 51. Duchêne, D. A., Duchêne, S. & Ho, S. Y. W. PhyloMAad: efficient assessment of  
652 phylogenomic model adequacy. *Bioinformatics.* **34**, 2300–2301 (2018).
- 653 52. Yang, Z. PAML 4: Phylogenetic analysis by maximum likelihood. *Mol. Biol. Evol.* **24**,  
654 1586–1591 (2007).
- 655 53. Nguyen, L-T., Schmidt, H. A., von Haeseler, A. & Minh, B. Q. IQ-TREE: A fast and  
656 effective stochastic algorithm for estimating maximum-likelihood phylogenies. *Mol. Biol.*  
657 *Evol.* **32**, 268–274 (2015).
- 658 54. Kalyaanamoorthy, S., Minh, B. Q., Wong, T. K. F., von Haeseler, A. & Jermini, L. S.  
659 ModelFinder: fast model selection for accurate phylogenetic estimates. *Nat Methods.* **14**,  
660 587–589 (2017).
- 661 55. Hoang, D. T., Chernomor, O., von Haeseler, A., Minh, B. Q. & Vinh, L. S. UFBoot2:  
662 Improving the ultrafast bootstrap approximation. *Mol. Biol. Evol.* **35**, 518–522 (2018).
- 663 56. Anisimova, M., Gil, M., Dufayard, J-F., Dessimoz, C. & Gascuel, O. Survey of branch  
664 support methods demonstrates accuracy, power, and robustness of fast likelihood-based  
665 approximation schemes. *Syst. Biol.* **60**, 685–699 (2011).
- 666 57. Minh, B. Q., Hahn, M. W. & Lanfear, R. New methods to calculate concordance factors  
667 for phylogenomic datasets. *Mol. Biol. Evol.* **37**, 2727–2733 (2020).

- 668 58. Zhang, C., Rabiee, M., Sayyari, E. & Mirarab, S. ASTRAL-III: polynomial time species  
669 tree reconstruction from partially resolved gene trees. *BMC Bioinformatics*. **19**, 153  
670 (2018).
- 671 59. Revell, L. J. phytools: an R package for phylogenetic comparative biology (and other  
672 things). *Methods. Ecol. Evol.* **2**, 217-223 (2012).
- 673 60. Mai, U. & Mirarab, S. TreeShrink: fast and accurate detection of outlier long branches in  
674 collections of phylogenetic trees. *BMC Genomics*. **19**, 272 (2018).
- 675 61. Robinson, D. F. & Foulds, L. R. Comparison of phylogenetic trees. *Math Biosci.* **53**,  
676 131–147 (1981).
- 677 62. Poliseño, A. *et al.* Evolutionary implications of analyses of complete mitochondrial  
678 genomes across order Zoantharia (Cnidaria: Hexacorallia). *J. Zool. Syst. Evol. Res.* **58**,  
679 858–868 (2020).
- 680 63. Emblem, Å. *et al.* Sea anemones possess dynamic mitogenome structures. *Mol.*  
681 *Phylogenet. Evol.* **75**, 184-193 (2014).
- 682 64. Celis, J. S. *et al.* Evolutionary and biogeographical implications of degraded  
683 LAGLIDADG endonuclease functionality and group I intron occurrence in stony corals  
684 (Scleractinia) and mushroom corals (Corallimorpharia). *PLoS One*, **12**, e0173734 (2017).
- 685 65. Foux, J., Brugler, M., Siddall, M. E., & Rodríguez, E. Multiplexed pyrosequencing of  
686 nine sea anemone (Cnidaria: Anthozoa: Hexacorallia: Actiniaria) mitochondrial  
687 genomes. *Mitochondrial DNA A* **27**, 2826-2832 (2016).
- 688 66. Seiblitiz, I. G. *et al.* Caryophylliids (Anthozoa, Scleractinia) and mitochondrial gene  
689 order: Insights from mitochondrial and nuclear phylogenomics. *Mol. Phyl. Evol.* **175**,  
690 107565 (2022).

- 691 67. Brugler, M. R., & France, S. C. The mitochondrial genome of a deep-sea bamboo coral  
692 (Cnidaria, Anthozoa, Octocorallia, Isididae): genome structure and putative origins of  
693 replication are not conserved among octocorals. *J. Mol. Evol.*, **67**(2), 125-136.
- 694 68. Johansen, S. D., & Emblem, Å. Mitochondrial Group I introns in hexacorals are  
695 regulatory genetic elements in *Advances in the Studies of the Benthic Zone (IntechOpen)*  
696 101 (2020).
- 697 69. DeBiasse, M., *et al.* A cnidarian phylogenomic tree fitted with hundreds of 18S  
698 leaves. *bioRxiv.* (2022)
- 699 70. Rodríguez, E., *et al.* Hidden among sea anemones: the first comprehensive phylogenetic  
700 reconstruction of the order Actiniaria (Cnidaria, Anthozoa, Hexacorallia) reveals a novel  
701 group of hexacorals. *PloS one*, **9**(5), e96998 (2014).
- 702 71. van Oppen, M. V., Willis, B. L., Vugt, H. V., & Miller, D. J. Examination of species  
703 boundaries in the *Acropora cervicornis* group (Scleractinia, Cnidaria) using nuclear DNA  
704 sequence analyses. *Mol. Ecol.* **9**(9), 1363-1373 (2000).
- 705 72. Vollmer, S. V., & Palumbi, S. R. Hybridization and the evolution of reef coral  
706 diversity. *Science*, **296**(5575), 2023-2025. (2002)
- 707 73. Reimer, J. D., Takishita, K., Ono, S., Tsukahara, J., & Maruyama, T. Molecular evidence  
708 suggesting interspecific hybridization in *Zoanthus* spp. (Anthozoa: Hexacorallia). *Zool.*  
709 *Sci.* **24**, 346-359 (2007).
- 710 74. Combosch, D. J., & Vollmer, S. V. Trans-Pacific RAD-Seq population genomics  
711 confirms introgressive hybridization in Eastern Pacific *Pocillopora* corals. *Mol.*  
712 *Phylogenet. Evol.* **88**, 154-162 (2015).

- 713 75. Quattrini, A. M. *et al.* A next generation approach to species delimitation reveals the role  
714 of hybridization in a cryptic species complex of corals. *BMC Evol. Biol.* **19**, 1-19 (2019).
- 715 76. Hellberg, M. E., Prada, C., Tan, M. H., Forsman, Z. H., & Baums, I. B. Getting a grip at  
716 the edge: recolonization and introgression in eastern Pacific *Porites* corals. *J.*  
717 *Biogeogr.* **43**, 2147-2159 (2016).
- 718 77. Forsman, Z. H. *et al.* Coral hybridization or phenotypic variation? Genomic data reveal  
719 gene flow between *Porites lobata* and *P. compressa*. *Mol. Phylogenet. Evol.* **111**, 132-  
720 148 (2017).
- 721 78. Chan, K. M., & Levin, S. A. Leaky prezygotic isolation and porous genomes: rapid  
722 introgression of maternally inherited DNA. *Evol.* **59**, 720-729 (2005).
- 723 79. Shearer, T. L., Van Oppen, M. J. H., Romano, S. L., & Wörheide, G. Slow mitochondrial  
724 DNA sequence evolution in the Anthozoa (Cnidaria). *Mol. Ecol.* **11**, 2475-2487 (2002).
- 725 80. Hey, J. Isolation with migration models for more than two populations. *Mol. Biol.*  
726 *Evol.* **27(4)**, 905-920. (2010)
- 727 81. Gompert, Z., Forister, M. L., Fordyce, J. A., & Nice, C. C. Widespread mito-nuclear  
728 discordance with evidence for introgressive hybridization and selective sweeps in  
729 *Lycaeides*. *Mol. Ecol.* **17(24)**, 5231-5244 (2008).
- 730 82. Linnen, C. R., & Farrell, B. D. Mitonuclear discordance is caused by rampant  
731 mitochondrial introgression in *Neodiprion* (Hymenoptera: Diprionidae)  
732 sawflies. *Evolution: International Journal of Organic Evolution*, **61(6)**, 1417-1438  
733 (2007).
- 734 83. Hibbins, M. S., & Hahn, M. W. Phylogenomic approaches to detecting and characterizing  
735 introgression. *Genetics* **220**, iyab173 (2022).



- 736 84. Li, Y., & Wu, D. D. Finding unknown species in the genomes of extant species. *J.*  
737 *Genetics Genomics*. **48(10)**, 867-871 (2021)
- 738 85. Schrider, D. R. Background selection does not mimic the patterns of genetic diversity  
739 produced by selective sweeps. *Genetics* **216**, 499-519 (2020).
- 740 86. Ramos, N.I., DeLeo D.M., McFadden, C.S., & Quattrini, A.M. Selection in coral  
741 mitogenomes, with insights into adaptations in the deep sea. *Sci. Rep.* Submitted.

742

### 743 **Acknowledgements**

744 This project was supported by the National Science Foundation (grants DEB-1457817 and DEB-  
745 1457581 to CSM and ER). P. Cowman provided the mt genome data for one specimen. A.  
746 Polisenio, L. Gusmão, and M. Xiao provided preliminary alignments of Zoantharia, Actiniaria,  
747 and Antipatharia. We thank D. Duchêne for providing advice on results of saturation tests.

748

### 749 **Author Contributions**

750 AMQ, CSM, and ER conceived the study. AMQ conducted phylogenetic analyses, generated  
751 tables and figures, and along with CSM wrote the manuscript. AMQ, CSM, KS, RPR, IGLS, JH,  
752 and HHW assembled, annotated and aligned mitochondrial genes. NIR conducted selection tests.  
753 CSM, IGLS, NIR, ER, and HHW edited the manuscript. All authors approved the final version.

754

### 755 **Competing interests**

756 The author(s) declare no competing interests.

757

### 758 **Data Availability**

759 Alignments, Tree files and code can be found on figshare XXXX

760 Mitochondrial genomes have been uploaded to genbank and respective numbers can be found in

761 supplemental tables.

762

763 **Figure Captions**

764 Figure 1. Maximum likelihood tree of Hexacorallia inferred from (left) mitochondrial and (right)

765 nuclear loci (50% taxon occupancy, no loci with substitution saturation as denoted in saturation

766 tests with missing data included). Numbered squares on branches identify clades discussed in

767 Results.

768

769 Figure 2. Maximum likelihood tree of Octocorallia inferred from (left) mitochondrial and (right)

770 nuclear loci (75% taxon occupancy, no loci with substitution saturation as denoted in saturation

771 tests without missing data). Numbered squares on branches identify clades discussed in Results.

772

773

774

775

776

777

778

779

780

781

782

783

784

785

786

787

788

789  
790  
791  
792  
793

Figure 1.

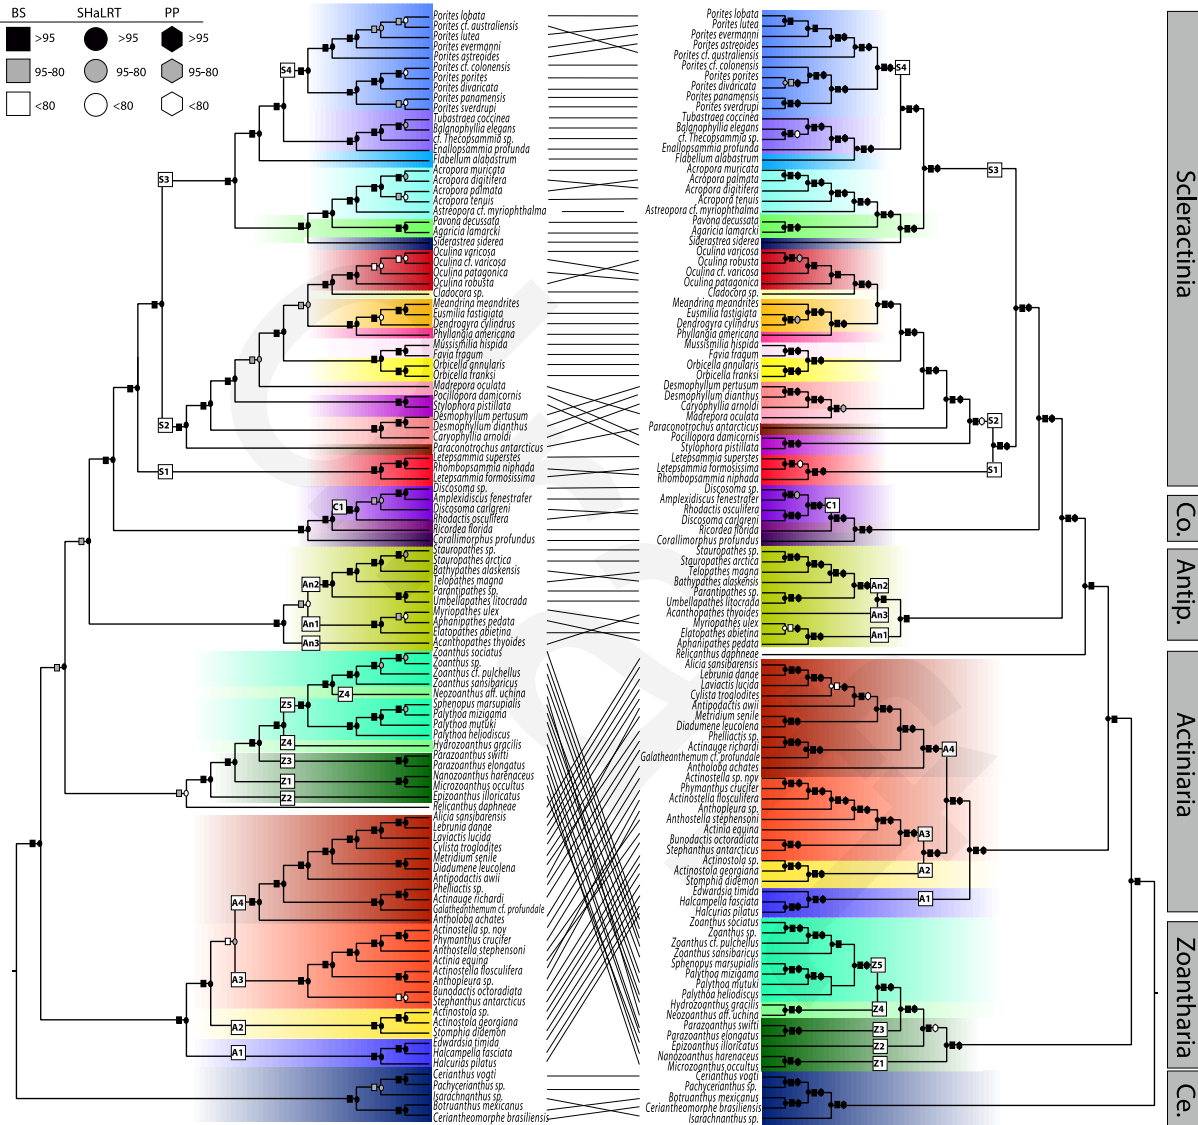

794  
795  
796  
797  
798  
799  
800

801  
802  
803  
804

Figure 2.

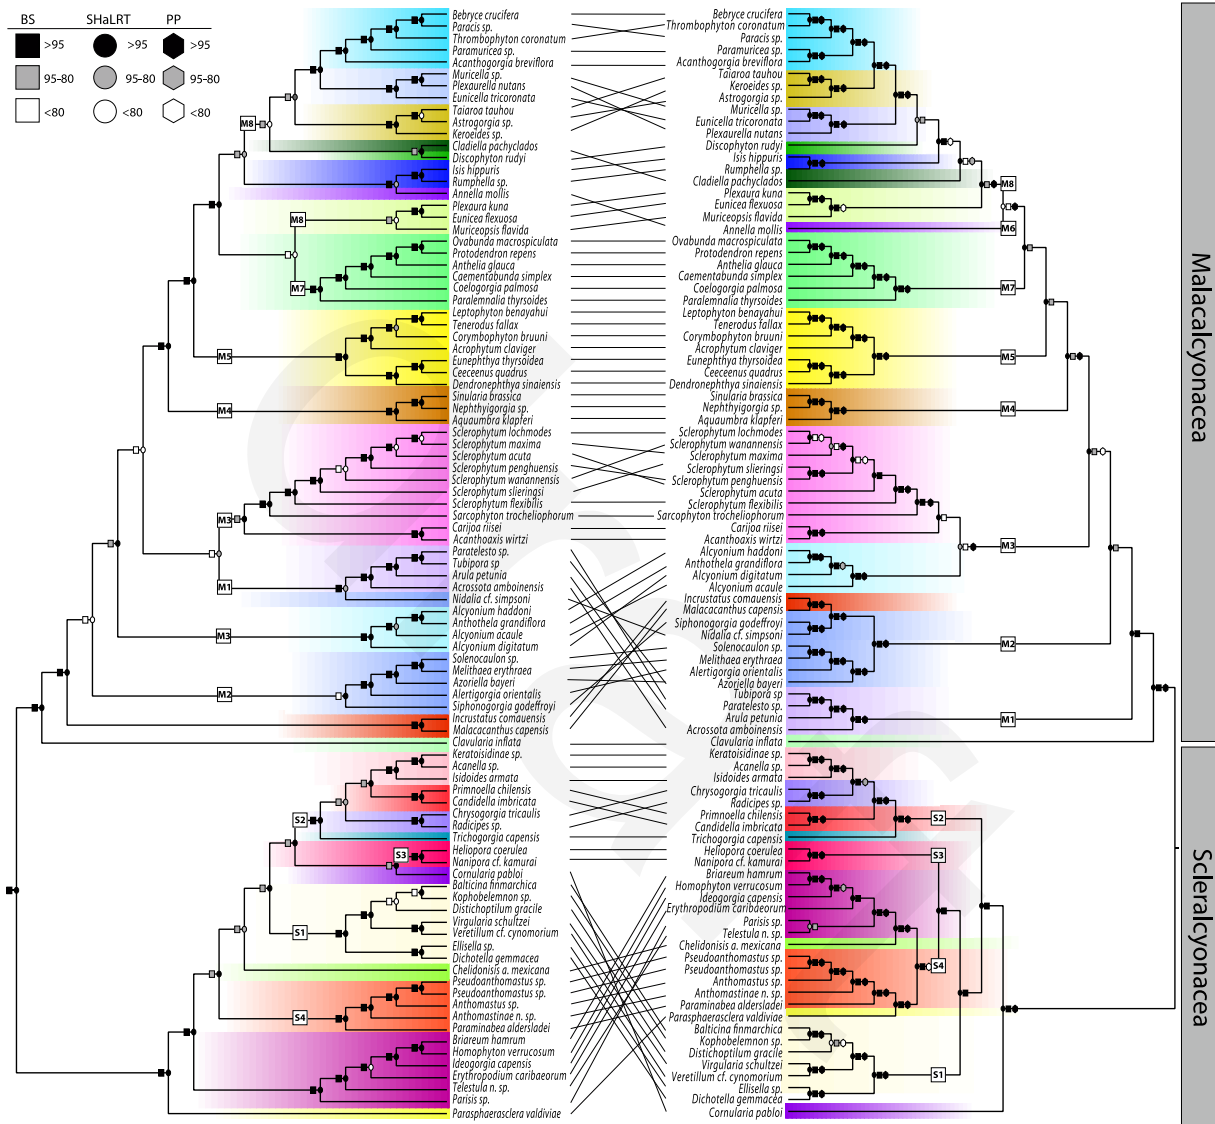

805  
806  
807  
808  
809  
810  
811  
812

813  
814  
815  
816  
817  
818

Supplemental Figure 1. Saturation test results produced by PhyloMad for (A) Hexacorallia and (B) Octocorallia.

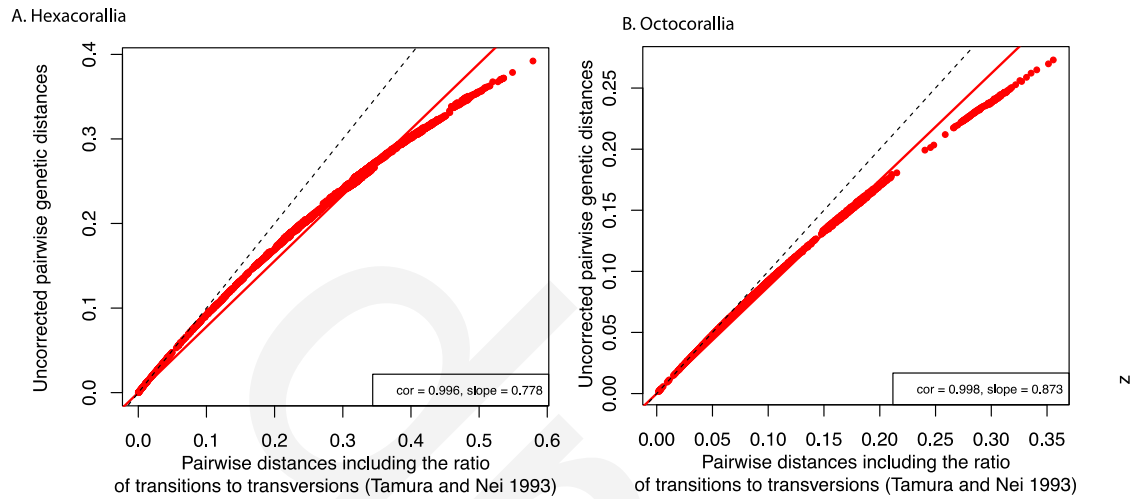

819  
820  
821  
822  
823  
824  
825  
826  
827  
828  
829  
830  
831  
832  
833  
834  
835  
836  
837  
838  
839

840  
841  
842  
843

Table 1. Summary statistics for different alignment datasets.

| Dataset             | Taxon Occupancy | # Loci | Alignment Size | # BS >95 | # BS 95-80 | # BS < 80 | # Sh >95 | # Sh 95-80 | # Sh <80 |
|---------------------|-----------------|--------|----------------|----------|------------|-----------|----------|------------|----------|
| <b>Hexacorallia</b> |                 |        |                |          |            |           |          |            |          |
| ASTRAL              | 75%             | 222    | NA             | 95*      | 2*         | 9*        | NA       | NA         | NA       |
| ASTRAL LR           | 75%             | 149    | NA             | 89*      | 4*         | 13*       | NA       | NA         | NA       |
| ASTRAL LRM          | 75%             | 95     | NA             | 92*      | 4*         | 10*       | NA       | NA         | NA       |
| 75                  | 75%             | 222    | 85327          | 100      | 3          | 3         | 101      | 1          | 5        |
| 75LR                | 75%             | 149    | 66567          | 100      | 3          | 3         | 100      | 1          | 4        |
| 75LRM               | 75%             | 95     | 38534          | 93       | 7          | 6         | 96       | 2          | 8        |
| 50                  | 50%             | 756    | 246027         | 103      | 2          | 1         | 103      | 2          | 1        |
| 50LR                | 50%             | 545    | 196468         | 103      | 1          | 2         | 103      | 1          | 2        |
| 50LRM               | 50%             | 380    | 126183         | 99       | 6          | 1         | 100      | 3          | 3        |
| Mito                | 94-98%          | 13     | 12465          | 94       | 7          | 5         | 83       | 11         | 12       |
| <b>Octocorallia</b> |                 |        |                |          |            |           |          |            |          |
| ASTRAL              | 75%             | 621    | NA             | 83*      | 4*         | 4*        | NA       | NA         | NA       |
| ASTRAL LR           | 75%             | 575    | NA             | 83*      | 1*         | 7*        | NA       | NA         | NA       |
| ASTRAL LRM          | 75%             | 408    | NA             | 76       | 7          | 8         | NA       | NA         | NA       |
| 75                  | 75%             | 621    | 305233         | 82       | 3          | 6         | 88       | 2          | 1        |
| 75LR                | 75%             | 575    | 290130         | 85       | 2          | 4         | 87       | 2          | 2        |
| 75LRM               | 75%             | 408    | 213477         | 80       | 8          | 4         | 85       | 4          | 2        |
| 50                  | 50%             | 1252   | 555701         | 82       | 5          | 4         | 87       | 2          | 2        |
| 50LR                | 50%             | 1161   | 529092         | 85       | 2          | 4         | 85       | 1          | 5        |
| 50LRM               | 50%             | 827    | 385627         | 85       | 4          | 2         | 86       | 3          | 2        |
| Mito                | 77-100%         | 14     | 16176          | 69       | 14         | 8         | 69       | 12         | 10       |

844 BS=bootstrap, SH= Shimodaira-Hasegawa approximate likelihood ratio test, LRM=low risk loci  
845 only with no missing data in saturation test, LR=low risk loci only while allowing for missing  
846 data in saturation test, mito=mitochondrial alignment, \*=posterior probability  
847

848

849 Table 2. Pairwise Robinson-Foulds distances between hexacorallia topologies and octocorallia topologies.

|                     | ASTRAL | ASTRAL LR | ASTRAL LRM | 75 | 75LR | 75LRM | 50 | 50LR | 50LRM | Mito |
|---------------------|--------|-----------|------------|----|------|-------|----|------|-------|------|
| <b>Hexacorallia</b> |        |           |            |    |      |       |    |      |       |      |
| ASTRAL              | 0      |           |            |    |      |       |    |      |       |      |
| ASTRAL LR           | 4      | 0         |            |    |      |       |    |      |       |      |
| ASTRAL LRM          | 12     | 12        | 0          |    |      |       |    |      |       |      |
| 75                  | 18     | 20        | 28         | 0  |      |       |    |      |       |      |
| 75LR                | 16     | 16        | 26         | 6  | 0    |       |    |      |       |      |
| 75LRM               | 26     | 24        | 26         | 20 | 20   | 0     |    |      |       |      |
| 50                  | 14     | 14        | 20         | 14 | 14   | 22    | 0  |      |       |      |
| 50LR                | 16     | 14        | 24         | 8  | 4    | 18    | 12 | 0    |       |      |
| 50LRM               | 26     | 24        | 24         | 18 | 18   | 22    | 12 | 14   | 0     |      |
| Mito                | 58     | 60        | 56         | 62 | 62   | 66    | 64 | 64   | 62    | 0    |
| <b>Octocorallia</b> |        |           |            |    |      |       |    |      |       |      |
| ASTRAL              | 0      |           |            |    |      |       |    |      |       |      |
| ASTRAL LR           | 6      | 0         |            |    |      |       |    |      |       |      |
| ASTRAL LRM          | 14     | 12        | 0          |    |      |       |    |      |       |      |
| 75                  | 28     | 32        | 30         | 0  |      |       |    |      |       |      |
| 75LR                | 34     | 36        | 36         | 6  | 0    |       |    |      |       |      |
| 75LRM               | 30     | 30        | 28         | 14 | 20   | 0     |    |      |       |      |
| 50                  | 24     | 28        | 30         | 10 | 16   | 24    | 0  |      |       |      |
| 50LR                | 28     | 32        | 32         | 4  | 10   | 18    | 6  | 0    |       |      |
| 50LRM               | 28     | 32        | 32         | 4  | 10   | 18    | 10 | 8    | 0     |      |
| Mito                | 72     | 70        | 68         | 68 | 66   | 60    | 68 | 66   | 68    | 0    |

850 LRM=low risk loci only with no missing data in saturation test, LR=low risk loci only with missing data in saturation test,  
 851 mito=mitochondrial alignment, 75=75% taxon occupancy dataset, 50=50% taxon occupancy dataset

852
